# Supplementary material for: Biosynthesis and incorporation of an alkylproline-derivative (APD) precursor into complex natural products
Source: Royal Society of Chemistry journal article supplement (doi:10.1039/c7np00047b), 2018-01-01
Supplement: c7np00047b1.pdf [file c7np00047b1.pdf]

| A-domain*          | substrate †         | 236 | 239 | 278 | 299 | 301 | 322 | 330 | 331 | organism                                     | Natural Product     |
|--------------------|---------------------|-----|-----|-----|-----|-----|-----|-----|-----|----------------------------------------------|---------------------|
|                    |                     | 202 | 205 | 244 | 272 | 274 | 298 | 306 | 307 |                                              |                     |
|                    |                     | 204 | 207 | 246 | 274 | 276 | 300 | 308 | 309 |                                              |                     |
| WP_052174032.1 (2) | Apd1,2,4,5,6        | V   | W   | C   | G   | G   | L   | L   | V   | <i>Streptomyces scabrisporus</i>             | unknown             |
| WP_050486890.1 (2) | Apd1,2,4,5,6        | V   | W   | C   | S   | G   | L   | L   | V   | <i>Streptomyces</i> sp. CNS654               | unknown             |
| WP_051836849.1 (2) | Apd1,2,4,5,6        | V   | W   | C   | G   | G   | L   | L   | V   | <i>Streptomyces</i> sp. NRRL WC-3742         | unknown             |
| WP_037678228.1 (2) | Apd1,2,4,6          | V   | M   | T   | G   | G   | C   | M   | A   | <i>Streptomyces catenulae</i>                | unknown             |
| WP_040888422.1 (2) | Apd1,2,4,6          | V   | M   | T   | G   | G   | C   | M   | A   | <i>Streptomyces mobaraensis</i>              | unknown             |
| KUN18767.1 (2)     | Apd1,2,3,4,6        | V   | M   | T   | G   | G   | C   | M   | A   | <i>Streptomyces antibioticus</i> DSM 40234   | unknown             |
| EHM24066.1         | Apd1,2,6            | T   | F   | N   | A   | G   | Y   | L   | A   | <i>Streptomyces</i> sp.W007                  | unknown             |
| WP_051187885.1 (1) | Apd1,2,6            | A   | Y   | S   | T   | G   | T   | L   | C   | <i>Nocardia tenerifensis</i> II              | unknown             |
| WP_036391166.1     | Apd1,2,4,6          | V   | Q   | F   | A   | A   | E   | I   | I   | <i>Micromonospora chokoriensis</i>           | unknown             |
| WP_030677493.1     | Apd1,2,6            | V   | Q   | F   | N   | A   | H   | M   | V   | <i>Streptomyces</i> sp. NRRL B-1347          | unknown             |
| HrmP (3)           | DH-PPL <sub>h</sub> | V   | Q   | F   | S   | A   | H   | G   | A   | <i>Streptomyces griseoflavus</i>             | Hormaomycin         |
| GrsB (1)           | Pro                 | V   | Q   | S   | I   | A   | H   | V   | V   | <i>Bacillus brevis</i>                       | Gramicidin-S        |
| TycB1 (1)          | Pro                 | V   | Q   | S   | I   | A   | H   | V   | V   | <i>Bacillus brevis</i>                       | Tyrocidine          |
| FenA (1)           | Pro                 | V   | Q   | V   | I   | A   | H   | V   | V   | <i>Bacillus subtilis</i>                     | Fengycin            |
| MycB (4)           | Pro                 | V   | Q   | F   | I   | A   | H   | V   | V   | <i>Bacillus subtilis</i>                     | Mycosubtilin        |
| ItuB (4)           | Pro                 | V   | Q   | F   | I   | A   | H   | V   | V   | <i>Bacillus subtilis</i>                     | Iturin A            |
| Pps4 (1)           | Pro                 | V   | Q   | F   | I   | A   | H   | V   | V   | <i>Bacillus subtilis</i>                     | Plipastatin         |
| SypA (2)           | Pro                 | V   | Q   | Y   | I   | A   | H   | V   | V   | <i>Pseudomonas syringae</i>                  | Syringopeptin       |
| PuwA (2)           | Pro                 | V   | Q   | F   | M   | A   | Q   | V   | V   | <i>Cylindrospermum alatosporum</i>           | Puwanaphycins       |
| MchC (2)           | Pro                 | A   | Q   | F   | I   | A   | Q   | V   | A   | <i>Stigmatella aurantiaca</i>                | Myxochromides S1-3  |
| NosD (2)           | Pro                 | V   | Q   | F   | I   | A   | H   | V   | I   | <i>Nostoc</i> sp. GSV224                     | Nostopeptolide A    |
| NcpB (3)           | mePro               | V   | Q   | F   | I   | A   | H   | V   | A   | <i>Nostoc</i> sp. ATCC 53789                 | Nostocyclopeptide A |
| NosA (3)           | mePro               | V   | Q   | F   | I   | A   | H   | L   | A   | <i>Nostoc</i> sp. GSV224                     | Nostopeptolide A    |
| CipA (2)           | Pro                 | V   | Q   | Y   | V   | A   | H   | V   | T   | <i>Pseudomonas cichorii</i> SF1-54           | Cichoheptins        |
| PstD (2)           | Pro                 | V   | Q   | Y   | V   | A   | H   | V   | V   | <i>Actinoplanes friuliensis</i>              | Friulimycin         |
| LpmD (2)           | Pro                 | V   | Q   | Y   | I   | A   | H   | V   | V   | <i>Streptomyces viridochromogenes</i>        | Laspartomycin       |
| ACMSIII (1)        | Pro                 | V   | Q   | F   | A   | A   | H   | V   | L   | <i>Streptomyces iakyrus</i>                  | Actinomycins        |
| AcmC (1)           | Pro                 | V   | Q   | F   | A   | A   | H   | V   | V   | <i>Streptomyces chrysomallus</i>             | Actinomycins        |
| Sky30 (2)          | Pro                 | V   | Q   | Y   | A   | A   | H   | V   | V   | <i>Streptomyces</i> sp.                      | Skyllamycin         |
| SnbDE (1)          | Pro                 | V   | Q   | Y   | A   | A   | H   | V   | M   | <i>Streptomyces pristinaespiralis</i>        | pristinamycin I(A)  |
| WP_037773348.1     | DH-EPL?             | V   | M   | Y   | A   | V   | M   | L   | A   | <i>Streptomyces sclerotialis</i>             | LIM                 |
| Lim2               | DH-EPL              | V   | M   | Y   | A   | V   | M   | L   | A   | <i>Streptomyces</i> sp. ICBB 8177            | Limazepines         |
| TomB               | DH-EPL              | V   | M   | Y   | T   | V   | M   | L   | A   | <i>Streptomyces achromogenes</i>             | Tomaymycin          |
| WP_019884141.1     | DH-EPL              | V   | M   | Y   | T   | V   | M   | L   | A   | <i>Streptomyces purpureus</i>                | TOM                 |
| WP_061926494.1     | DH-EPL?             | V   | M   | Y   | T   | V   | M   | L   | A   | <i>Streptomyces bungoensis</i>               | TOM                 |
| WP_053671522.1     | DH-EPL?             | V   | M   | Y   | T   | V   | M   | L   | A   | <i>Streptomyces</i> sp. NRRL B-1140          | TOM                 |
| KOG74888.1         | DH-EPL?             | V   | M   | Y   | T   | V   | M   | L   | A   | <i>Streptomyces antibioticus</i> NRRL B-2032 | TOM                 |
| OQD56811.1         | DH-EPL?             | V   | M   | Y   | T   | V   | M   | L   | A   | <i>Streptomyces phaeoluteigriseus</i>        | TOM                 |
| KMS87275.1         | DH-EPL?             | V   | M   | Y   | T   | V   | M   | L   | A   | <i>Streptomyces regensis</i>                 | TOM                 |
| NpsB               | Pro                 | V   | Q   | Y   | Y   | T   | L   | V   | C   | <i>Klebsiella oxytoca</i>                    | Tilivalline         |
| SEG83667.1         | 2C APD?             | V   | Q   | Y   | Y   | T   | I   | L   | C   | <i>Actinomadura echinospora</i>              | SIB                 |
| WP_040694105.1     | DH-PPL?             | V   | L   | F   | Y   | T   | A   | W   | C   | <i>Nocardioopsis prasina</i>                 | SIB                 |
| WP_047312981.1     | 2C APD?             | V   | E   | F   | Y   | T   | V   | L   | C   | <i>Dermacoccus</i> sp. PE3                   | SIB                 |
| WP_073789160.1     | DH-PPL?             | V   | E   | F   | Y   | T   | A   | L   | C   | <i>Streptomyces uncialis</i>                 | SIB                 |
| SCK09874.1         | DH-PPL?             | V   | E   | F   | Y   | T   | A   | L   | C   | <i>Streptomyces</i> AmelKG-E11A              | SIB                 |
| WP_071803261.1     | DH-PPL?             | V   | M   | F   | C   | T   | A   | L   | V   | <i>Couchioplanes caeruleus</i>               | SIB                 |
| SCF39935.1         | DH-PPL?             | V   | M   | F   | C   | T   | A   | L   | V   | <i>Micromonospora echinospora</i>            | SIB                 |
| SibD               | DH-PPL              | V   | M   | F   | Y   | T   | A   | L   | V   | <i>Streptosporangium sibiricum</i>           | Sibiromycin         |
| ORF22              | DH-PPL              | V   | L   | Y   | Y   | T   | A   | L   | V   | <i>Streptomyces refuineus</i>                | Anthramycin         |
| WP_014985045.1     | DH-PPL?             | V   | L   | Y   | Y   | T   | A   | L   | C   | <i>Nocardia brasiliensis</i>                 | ANT                 |
| WP_040743488.1     | DH-PPL?             | V   | I   | Y   | Y   | T   | A   | L   | C   | <i>Nocardia tenerifensis</i> I               | ANT                 |
| WP_018681051.1     | DH-PPL?             | V   | I   | F   | Y   | T   | A   | L   | C   | <i>Actinokineospora enzanensis</i>           | ANT                 |
| WP_043667671.1     | DH-PPL?             | V   | L   | Y   | Y   | T   | A   | L   | C   | <i>Nocardia vulneris</i>                     | ANT                 |
| WP_033289433.1     | DH-PPL?             | V   | L   | Y   | Y   | T   | A   | L   | C   | <i>Amycolatopsis jejuensis</i>               | POR                 |
| Por21              | DH-PPL              | V   | L   | Y   | Y   | T   | A   | L   | C   | <i>Streptomyces albus</i>                    | Porothramycin       |
| LmbC               | PPL                 | V   | A   | L   | V   | A   | I   | G   | C   | <i>Streptomyces lincolnensis</i>             | Lincomycin          |
| CcbC               | Pro                 | V   | F   | Y   | C   | A   | L   | V   | C   | <i>Streptomyces caelestis</i>                | Celesticetin        |
| AnaC (O)           | Pro                 | L   | F   | Y   | L   | A   | L   | V   | C   | <i>Oscillatoria</i> PCC 6506                 | Anatoxin-a          |
| AnaC (A)           | Pro                 | L   | F   | Y   | L   | A   | L   | V   | C   | <i>Anabaena</i> sp.                          | Anatoxin-a          |
| RedM               | Pro                 | L   | F   | Y   | L   | A   | L   | V   | C   | <i>Streptomyces coelicolor</i>               | Undecylprodigiosin  |
| RphM               | Pro                 | L   | F   | Y   | L   | A   | L   | V   | C   | <i>Streptomyces griseoviridis</i>            | Prodigiosin         |
| MarM               | Pro                 | L   | F   | Y   | L   | A   | L   | V   | C   | <i>Streptomyces</i> sp. CNQ-617              | Marineosins         |
| HrmK               | Pro                 | L   | F   | Y   | A   | A   | L   | V   | C   | <i>Streptomyces griseoflavus</i>             | Hormaomycin         |
| Pyr8               | Pro                 | L   | F   | Y   | I   | A   | W   | V   | C   | <i>Streptomyces vitaminophilus</i>           | Pyrrrolomycin       |
| Pigl               | Pro                 | L   | F   | Y   | T   | A   | W   | V   | C   | <i>Serratia marcescens</i>                   | Prodigiosin         |
| Hapl               | Pro                 | L   | F   | Y   | I   | A   | F   | V   | C   | <i>Hahella chejuensis</i>                    | Prodigiosin         |
| Bmp4               | Pro                 | L   | F   | Y   | I   | A   | F   | V   | C   | <i>Pseudoalteromonas</i> sp. PS5             | Tetrabromopyrrole   |
| NgnN4              | Pro                 | L   | L   | Y   | L   | A   | L   | V   | C   | <i>Nocardia</i> sp.                          | Nargenicin A(1)     |
| IdmJ               | Pro                 | L   | L   | Y   | L   | A   | L   | V   | C   | <i>Streptomyces antibioticus</i>             | Indanomycin         |
| CalN2              | Pro                 | L   | L   | Y   | L   | A   | L   | V   | C   | <i>Streptomyces chartreusis</i>              | Calcimycin          |
| CouN4              | Pro                 | L   | L   | Y   | L   | A   | L   | V   | C   | <i>Streptomyces rishiriensis</i>             | Coumermycin A1      |
| CloN4              | Pro                 | L   | L   | Y   | L   | A   | L   | V   | C   | <i>Streptomyces roseochromogenes</i>         | Clorobiocin         |
| DkxA (S)           | Pro                 | L   | L   | Y   | L   | A   | L   | V   | C   | <i>Stigmatella aurantiaca</i>                | Dkxanthenes         |
| DkxA (M)           | Pro                 | L   | L   | Y   | L   | A   | L   | V   | C   | <i>Myxococcus xanthus</i>                    | Dkxanthenes         |
| Leu5               | Pro                 | L   | L   | Y   | L   | A   | L   | V   | C   | <i>Sorangium cellulosum</i>                  | Leupyrrins          |
| PITF               | Pro                 | L   | L   | Y   | L   | A   | L   | V   | C   | <i>Pseudomonas fluorescens</i>               | Pyoluteorin         |

Figure S1. Comparison of the nonribosomal codes of A-domains activating L-proline and L-proline derivatives. The highly conserved D and K residues at the boundaries of nonribosomal codes are omitted. The same set of A-domains is shown in phylogenetic tree in Figure 10. Amino acids are numbered at the top according to the A-domain of GrsA (PheA) (first row), CcbC (second row), and LmbC (third row). Residues of stand-alone A-domains in accordance with consensus of L-proline-specific stand-alone A-domains are in blue. Residues of modular A-domains in accordance with consensus of L-proline-specific modular A-domains are in red. \*Names of NRPSs obtained by the genome mining are represented by the GenBank accession number; number in parentheses behind the name of NRPS denotes the order of the A-domain in NRPS protein chain, if relevant; letter in parentheses denotes the source organism. †mePro – 4-methyl-L-proline; putative substrates of ten A-domains obtained by the genome mining are represented by the respective set of the APD biosynthetic proteins, the predicted products of these protein sets are presented in main text Table 1.
