# Supplementary material for: Biosynthesis and incorporation of an alkylproline-derivative (APD) precursor into complex natural products
Source: Royal Society of Chemistry journal article supplement (doi:10.1039/c7np00047b), 2018-01-01
Supplement: c7np00047b2.pdf [file c7np00047b2.pdf]

Table S1 Specification of new APD BGCs.

| A. Putative PBDs              |                                                 |                |                      |                                                                                       |
|-------------------------------|-------------------------------------------------|----------------|----------------------|---------------------------------------------------------------------------------------|
|                               | Organism                                        | Apd1 accession | A-domain accession   | Predicted APD                                                                         |
| TOM                           | <i>Streptomyces bungoensis</i>                  | WP_061926485.1 | WP_061926494.1       | DH-EPL                                                                                |
|                               | <i>Streptomyces phaeoluteigriseus</i>           | OJT48496.1     | OQD56811.1           | DH-EPL                                                                                |
|                               | <i>Streptomyces regensis</i>                    | KMS87272.1     | KMS87275.1           | DH-EPL                                                                                |
|                               | <i>Streptomyces antibioticus</i><br>NRRL B-2032 | WP_051816305.1 | KOG74888.1           | DH-EPL                                                                                |
|                               | <i>Streptomyces purpureus</i>                   | WP_040875304.1 | WP_019884141.1       | DH-EPL                                                                                |
|                               | <i>Streptomyces</i> sp. NRRL B-1140             | WP_053671525.1 | WP_053671522.1       | DH-EPL                                                                                |
| LIM                           | <i>Streptomyces sclerotialus</i>                | WP_037773342.1 | WP_037773348.1       | DH-EPL                                                                                |
| SIB                           | <i>Actinomadura echinospora</i>                 | SEG83572.1     | SEG83667.1           | DH-EPL                                                                                |
|                               | <i>Streptomyces uncialis</i>                    | WP_073788394.1 | WP_073789160.1       | DH-PPL                                                                                |
|                               | <i>Streptomyces</i> AmelKG-E11A                 | SCK10057.1     | SCK09874.1           | DH-PPL                                                                                |
|                               | <i>Couchioplanes caeruleus</i>                  | WP_071803239.1 | WP_071803261.1       | DH-PPL                                                                                |
|                               | <i>Micromonospora echinospora</i>               | SCF40038.1     | SCF39935.1           | DH-PPL                                                                                |
|                               | <i>Dermacoccus</i> sp. PE3                      | WP_052947174.1 | WP_047312981.1       | DH-EPL/8                                                                              |
|                               | <i>Nocardiopsis prasina</i>                     | WP_017545372.1 | WP_040694105.1       | DH-PPL                                                                                |
| ANT                           | <i>Actinokineospora enzanensis</i>              | WP_018681043.1 | WP_018681051.1       | DH-PPL                                                                                |
|                               | <i>Nocardia tenerifensis</i> I                  | WP_040743483.1 | WP_040743488.1       | DH-PPL                                                                                |
|                               | <i>Nocardia brasiliensis</i>                    | WP_014985053.1 | WP_014985045.1       | DH-PPL                                                                                |
|                               | <i>Nocardia vulneris</i>                        | WP_043667451.1 | WP_043667671.1       | DH-PPL                                                                                |
| POR                           | <i>Amycolatopsis jejuensis</i>                  | WP_033289431.1 | WP_033289433.1       | DH-PPL                                                                                |
| B. Putative non-PBD compounds |                                                 |                |                      |                                                                                       |
| 1,2                           | <i>Streptomyces avermitilis</i>                 | WP_037650540.1 | 0/4                  | APD 2/3                                                                               |
|                               | <i>Actinoplanes utahensis</i>                   | WP_043526719.1 | 0/6                  |                                                                                       |
| 1,2,6                         | <i>Streptomyces</i> sp. W007                    | WP_007460155.1 | EHM24066.1 /6        | 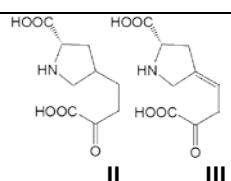 |
|                               | <i>Streptomyces avicenniae</i>                  | WP_052847609.1 | 0/0                  |                                                                                       |
|                               | <i>Amycolatopsis mediterranei</i>               | YP_003767687.1 | 0/0                  |                                                                                       |
|                               | <i>Nocardia tenerifensis</i> II                 | WP_051187886.1 | WP_051187885.1(1) /6 |                                                                                       |
|                               | <i>Streptomyces</i> sp. NRRL B-1347             | WP_051854982.1 | WP_030677493.1 /5    |                                                                                       |
| 1,2,3,4                       | <i>Salinispora arenicola</i>                    | WP_051422804.1 | ?/?                  | APD 5                                                                                 |
| 1,2,4,6                       | <i>Micromonospora chokoriensis</i>              | WP_030487095.1 | WP_036391166.1 /8    |  |
|                               | <i>Streptomyces mobaraensis</i>                 | WP_004940943.1 | WP_040888422.1 (2)/6 |                                                                                       |
|                               | <i>Streptomyces catenulae</i>                   | WP_030283633.1 | WP_037678228.1 (2)/4 |                                                                                       |
| 1,2,4,5,6                     | <i>Streptomyces</i> sp. CNS654                  | WP_050486887.1 | WP_050486890.1 (2)/4 | EPL, DH-EPL                                                                           |
|                               | <i>Streptomyces scabrissporus</i>               | WP_020555671.1 | WP_052174032.1 (2)/4 |                                                                                       |
|                               | <i>Streptomyces</i> sp. NRRL WC-3742            | WP_031068416.1 | WP_051836849.1 (2)/4 |                                                                                       |
| 1,2,3,4,6                     | <i>Streptomyces antibioticus</i><br>DSM 40234   | WP_059197633.1 | KUN18767.1 (2)/3     | DH-PPL <sub>n</sub>                                                                   |
|                               | <i>Amycolatopsis alba</i>                       | WP_039795848.1 | 0/3                  |                                                                                       |
|                               | <i>Kibdelosporangium</i> sp. MJ126-NF4          | CTQ98696.1     | 0/1                  |                                                                                       |

GenBank accession numbers of putative Apd1 and A-domain coding sequences used for the construction of phylogenetic trees in Fig. 9 and Fig. 10. The order of the A-domain used for the tree construction in respective NRPS protein chain (when applicable) is presented in brackets behind the A-domain accession number. Total number of A-domains identified in respective BGC is behind the slash. The question mark means that the length of available contig does not allow determining the presence/absence of the A-domain in the BGC with a sufficient certainty.
